# Supplementary material for: Structural and defect modulations of co-precipitation synthesized high-entropy Prussian blue analogue nanocubes via Cu/Zn co-doping for enhanced electrochemical performance
Source: Royal Society of Chemistry journal article supplement (doi:10.1039/d3ta01967e), 2023-01-01
Supplement: d3ta01967e1.pdf [file d3ta01967e1.pdf]

## Supporting Information

### **Structural and defect modulations of co-precipitation synthesized high-entropy Prussian blue analogue nanocubes via Cu/Zn co-doping for enhanced electrochemical performance**

Van Thanh Nguyen<sup>#</sup>, Fitri Nur Indah Sari<sup>#</sup>, Brahmanu Wisnu Saputro, Jyh-Ming Ting<sup>\*</sup>

Department of Materials Science and Engineering

University, No 1 University Road, Tainan 70101, Taiwan

<sup>\*</sup> Corresponding author: [jting@mail.ncku.edu.tw](mailto:jting@mail.ncku.edu.tw)

<sup>#</sup> Equal contribution 1<sup>st</sup> author

### Information S1

The ion diffusion coefficient is estimated using the Randles-Sevick equation:

$$I_p = (2.69 \times 10^5) n^{1.5} AD^{0.5} C \nu^{0.5} \quad (\text{S1})$$

where  $I_p$  is the peak current,  $n$  is the number of electrons transferred,  $A$  is the surface area of the electrode,  $D$  is ion diffusion coefficient,  $C$  is the ion concentration in the electrolyte, and  $\nu$  is the scan rate. In general,  $n$ ,  $A$ , and  $C$  are constants. Thus, the slope of the plot of  $I_p$  vs.  $\nu^{0.5}$  represents the ion diffusion rate.

### Information S2

The percentages of surface capacitive and diffusion-controlled charge storages are estimated using Equation S2.

$$i(V) = k_1 \nu + k_2 \nu^{1/2} \quad (\text{S2})$$

where  $i(V)$  is the current at a constant potential,  $k_1$  and  $k_2$  are the constants, and  $\nu$  is the scan rate.  $k_1 \nu$  and  $k_2 \nu^{1/2}$  represent the surface-capacitive and diffusion-controlled current, respectively. From Equation S2, by plotting  $i(V)/\nu^{1/2}$  vs  $\nu^{1/2}$ , the values of  $k_1$  and  $k_2$  can be determined from the slope and the intercept of the curve, respectively. From the  $k_1$  and  $k_2$  values at specific potential, the percentage of the currents from surface-capacitive and diffusion-controlled can be calculated.

Table S1. ICP and EA concentrations of the obtained samples.

| Sample ID | ICP (wt%) |      |     |      |      |      | EA (wt%) |      |      | $\Delta S_{conf}$ |
|-----------|-----------|------|-----|------|------|------|----------|------|------|-------------------|
|           | Fe        | Co   | Ni  | Mn   | Cu   | Zn   | C        | N    | H    |                   |
| CNM       | 47.5      | 21.1 | 8.5 | 22.9 | 0.0  | 0.0  | 19.4     | 22.3 | 1.27 | 1.22 R            |
| CNMCu     | 44.8      | 13.2 | 5.2 | 13.9 | 22.9 | 0.0  | 18.4     | 21   | 1.58 | 1.38R             |
| CNMZn     | 41.9      | 12.1 | 7.2 | 13.5 | 0.0  | 25.3 | 18.7     | 21.3 | 1.55 | 1.42R             |
| CNMCuZn   | 43.1      | 10.7 | 5.9 | 9.8  | 14.0 | 16.5 | 18.6     | 21   | 1.58 | 1.55R             |
| CNM2CuZn  | 40.4      | 8.8  | 8.6 | 8.0  | 19.5 | 14.7 | 17.6     | 19.8 | 2.06 | 1.57R             |
| CNMCu2Zn  | 40.1      | 6.1  | 5.0 | 6.3  | 16.8 | 25.9 | 16.7     | 18.4 | 2.41 | 1.51R             |
| CNM2Cu2Zn | 35.7      | 6.1  | 4.1 | 4.7  | 20.6 | 28.8 | 17.9     | 20   | 2.03 | 1.51R             |

The configurational entropy ( $\Delta S_{conf}$ ) of an n component system can be calculated using below equation<sup>1, 2</sup>:

$$\Delta S_{conf} = -R \sum_{i=1}^n x_i \ln x_i \quad (S3)$$

where R is the ideal gas constant and  $x_i$  is the molar fraction of the  $i^{\text{th}}$  component.

Table S2. Average particle sizes of as-prepared PBAs.

| Sample ID | Average particle size (nm) |
|-----------|----------------------------|
| CNM       | 292 ± 34                   |
| CNMCu     | 307 ± 46                   |
| CNMZn     | 226 ± 19                   |
| CNMCuZn   | 158 ± 25                   |
| CNM2CuZn  | 170 ± 38                   |
| CNMCu2Zn  | 128 ± 33                   |
| CNM2Cu2Zn | 130 ± 21                   |

Table S3. BET surface area, and pore size and volume.

| Sample ID | BET surface area (m <sup>2</sup> g <sup>-1</sup> ) | Pore size (nm) | Pore volume (cm <sup>3</sup> g <sup>-1</sup> ) |
|-----------|----------------------------------------------------|----------------|------------------------------------------------|
| CNM       | 6.2                                                | 10.9           | 0.017                                          |
| CNMCu     | 8.9                                                | 12.8           | 0.029                                          |
| CNMZn     | 24.8                                               | 26.6           | 0.153                                          |
| CNMCuZn   | 167.1                                              | 3.2            | 0.134                                          |
| CNM2CuZn  | 385.8                                              | 2.7            | 0.256                                          |
| CNMCu2Zn  | 596.9                                              | 2.9            | 0.439                                          |
| CNM2Cu2Zn | 539.8                                              | 3.0            | 0.383                                          |

Table S4. The x, y and z values in  $K_xM[Fe(CN)_6]_y[\square Fe(CN)_6]_{(1-y)} \cdot zH_2O$ .

| Sample ID | x    | y    | Z    |
|-----------|------|------|------|
| CNM       | 1.58 | 0.93 | 2.37 |
| CNMCu     | 1.28 | 0.87 | 4.04 |
| CNMZn     | 0.96 | 0.78 | 3.25 |
| CNMCuZn   | 0.98 | 0.83 | 5.19 |
| CNM2CuZn  | 0.93 | 0.74 | 4.34 |
| CNMCu2Zn  | 0.76 | 0.77 | 3.33 |
| CNM2Cu2Zn | 0.38 | 0.62 | 4.11 |

Table S5. Comparison of electrochemical performances of PBA-based materials.

| Materials                              | Capacitance (capacity)                                                     | Cycle stability           | Electrolyte                          | Refs         |
|----------------------------------------|----------------------------------------------------------------------------|---------------------------|--------------------------------------|--------------|
| CNM2Cu2Zn HEPBA nanocube               | 336 F g <sup>-1</sup> (44.8 mAh g <sup>-1</sup> ) at 1 A g <sup>-1</sup>   | 70.8 % after 3,000 cycles | 3M KOH                               | This work    |
| Cobalt PBA nanoparticle                | 250 F g <sup>-1</sup> at 5 mV s <sup>-1</sup>                              | 93.5% after 5,000 cycles  | 0.5M Na <sub>2</sub> SO <sub>4</sub> | <sup>3</sup> |
| Mesoporous Cobalt PBA                  | 295 F g <sup>-1</sup> at 5 mV s <sup>-1</sup>                              | 50% after 100 cycles      | 1M NaClO <sub>4</sub>                | <sup>4</sup> |
| Ni-doped Cobalt PBA                    | 466 F g <sup>-1</sup> (129.4 mAh g <sup>-1</sup> ) at 5 mV s <sup>-1</sup> | 87.9% after 2,000 cycles  | 1M Na <sub>2</sub> SO <sub>4</sub>   | <sup>5</sup> |
| CoFe PBA hollow nanocubes              | 2526 F g <sup>-1</sup> at 0.5 A g <sup>-1</sup>                            | 90.25% after 2,000 cycles | 3 M KOH                              | <sup>6</sup> |
| K(MgMnFeNiCu)Fe(CN) <sub>6</sub> HEPBA | 175 F g <sup>-1</sup> at 5 mV s <sup>-1</sup>                              | -                         | 1M Na <sub>2</sub> SO <sub>4</sub>   | <sup>7</sup> |
| K(MgMnCoNiCu)Fe(CN) <sub>6</sub> HEPBA | 160 F g <sup>-1</sup> at 5 mV s <sup>-1</sup>                              | -                         | 1M Na <sub>2</sub> SO <sub>4</sub>   | <sup>7</sup> |
| K(MgMnFeCoNi)Fe(CN) <sub>6</sub> HEPBA | 135 F g <sup>-1</sup> at 5 mV s <sup>-1</sup>                              | -                         | 1M Na <sub>2</sub> SO <sub>4</sub>   | <sup>7</sup> |

Table S6. OER EIS analysis.

| Sample ID | Rs                 |       | Rct                |       | CPE       |       |
|-----------|--------------------|-------|--------------------|-------|-----------|-------|
|           | Value ( $\Omega$ ) | error | Value ( $\Omega$ ) | error | Value (F) | error |
| CNM       | 0.49               | 0.003 | 9.32               | 0.058 | 0.87      | 0.003 |
| CNMCu     | 0.91               | 0.006 | 4.26               | 0.032 | 0.83      | 0.006 |
| CNMZn     | 0.83               | 0.004 | 7.83               | 0.055 | 0.79      | 0.003 |
| CNMCuZn   | 0.81               | 0.005 | 3.07               | 0.029 | 0.82      | 0.007 |
| CNM2CuZn  | 0.39               | 0.004 | 1.72               | 0.022 | 0.77      | 0.008 |
| CNMCu2Zn  | 0.71               | 0.004 | 3.62               | 0.031 | 0.8       | 0.006 |
| CNM2Cu2Zn | 0.46               | 0.003 | 1.07               | 0.012 | 0.76      | 0.008 |

Table S7. Comparison of electrocatalytic performances of PBA-based materials.

| Materials                | Overpotential                                                         | Stability | Refs      |
|--------------------------|-----------------------------------------------------------------------|-----------|-----------|
| NiFe PBA nanocube        | 258 mV at 10 mA cm <sup>-2</sup>                                      | 100 h     | 8         |
| FeCo PBA core shell      | 271 mV at 10 mA cm <sup>-2</sup>                                      | 24 h      | 9         |
| CoFe PBA nanocube        | 366 mV at 10 mA cm <sup>-2</sup>                                      | -         | 10        |
| Co-Fe PBA nanocube       | 356 mV at 50 mA cm <sup>-2</sup>                                      | -         | 11        |
| NiFe PBA hollow nanocube | 389 mV at 20 mA cm <sup>-2</sup>                                      | -         | 12        |
| CoFe-PBA/CFP nanosheet   | 314 mV at 10 mA cm <sup>-2</sup>                                      | -         | 13        |
| CNM2CuZn HEPBA nanocube  | 242 mV at 10 mA cm <sup>-2</sup> and 305 mV at 50 mA cm <sup>-2</sup> | 60 h      | This work |

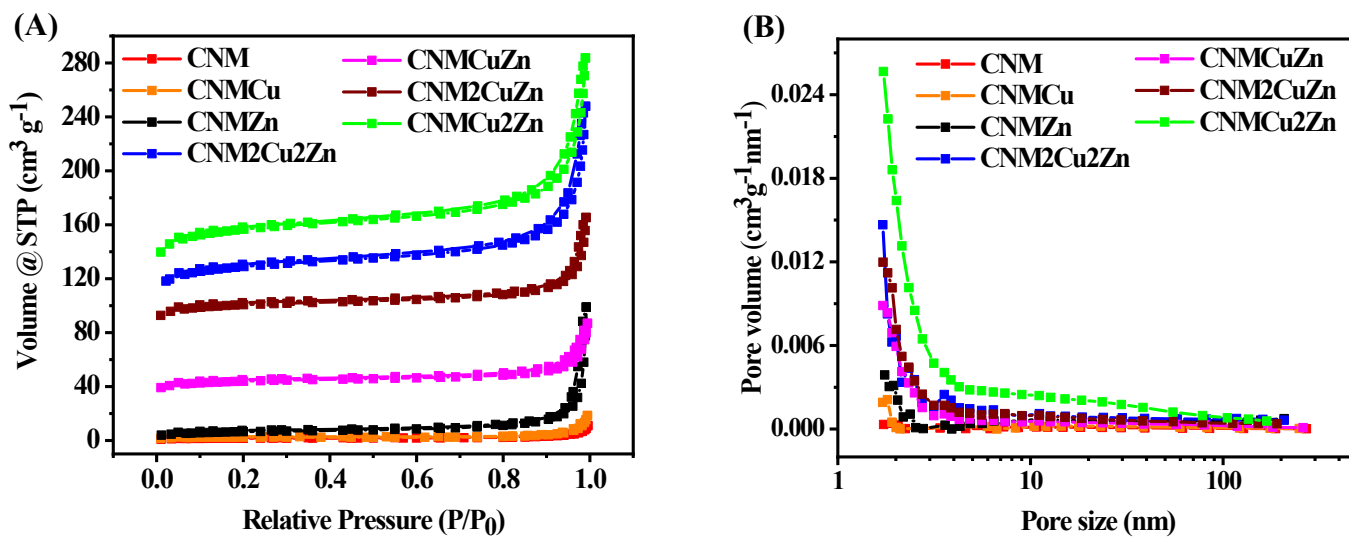

Figure S1. (A) Nitrogen gas adsorption and desorption isothermal. (B) Pore size distribution curves.

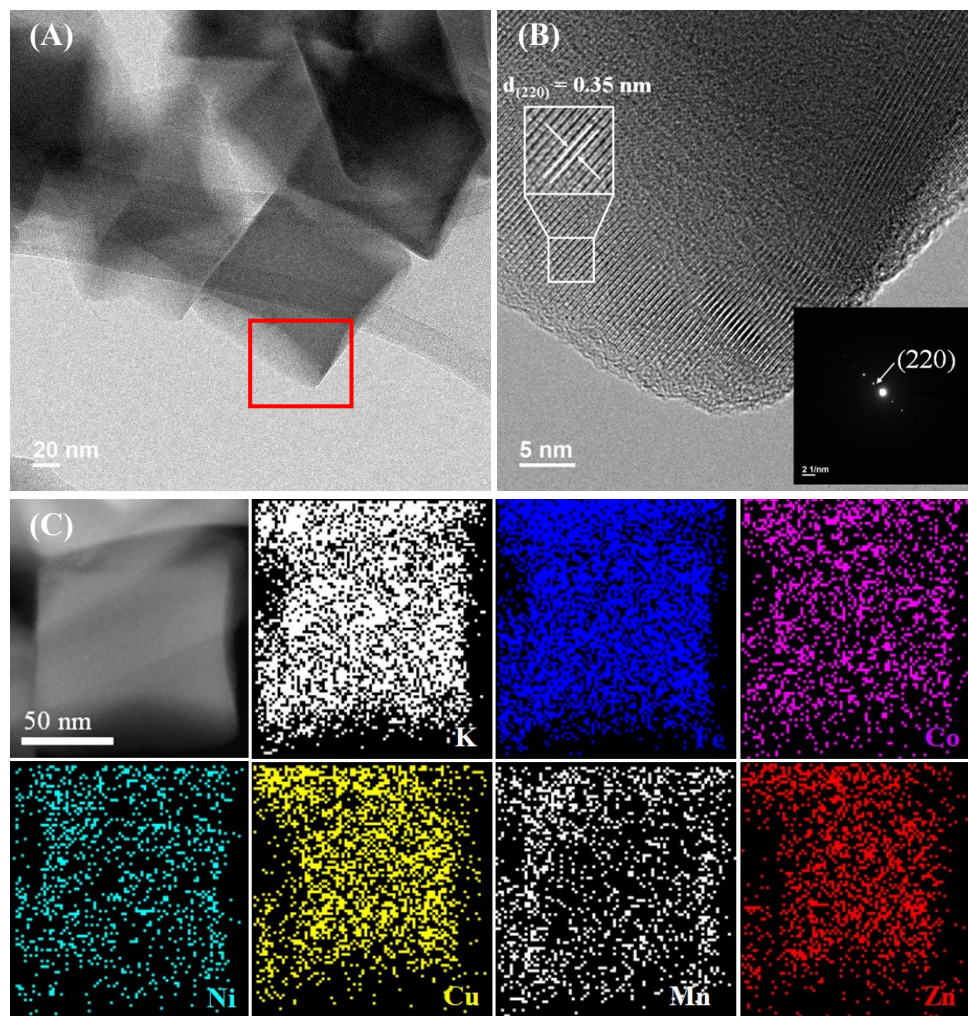

Figure S2. (A) TEM image, (B) HR-TEM image and NBED of red rectangle in (A), and (C) HAADF image and EDS mapping of CNM2CuZn.



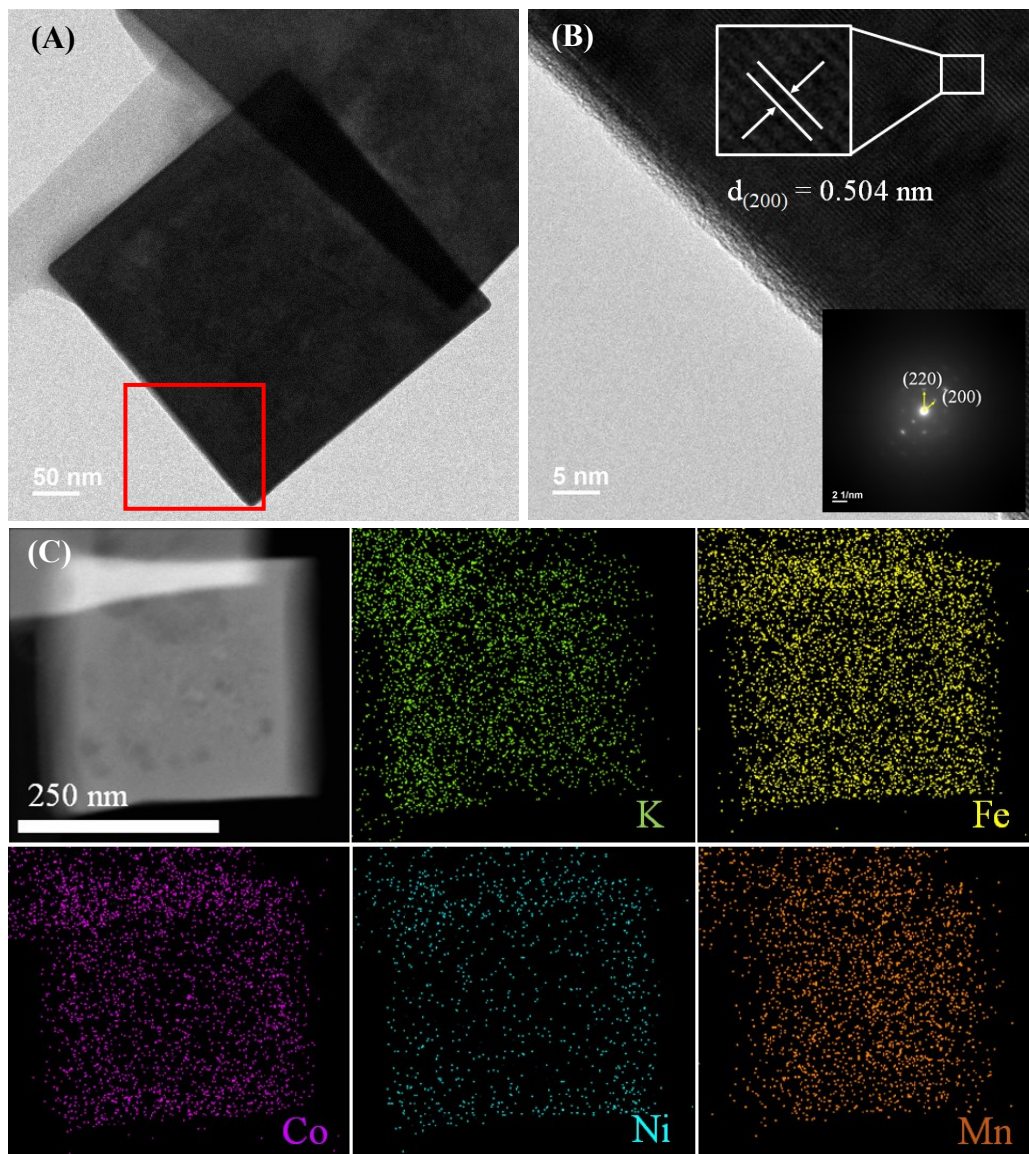

Figure S3. (A) TEM image, (B) HR-TEM image and NBED of red rectangle in (A), and (C) HAADF image and EDS mapping of CNM.

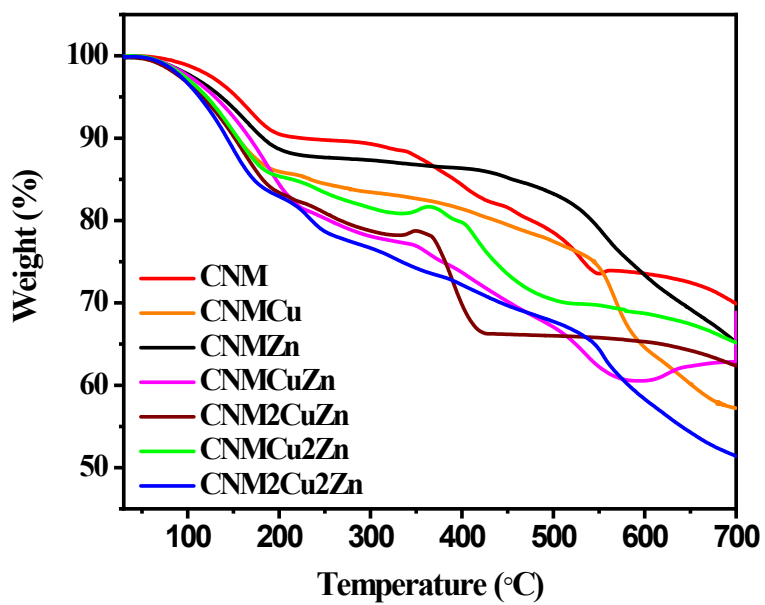

Figure S4. TGA analysis of various PBAs.

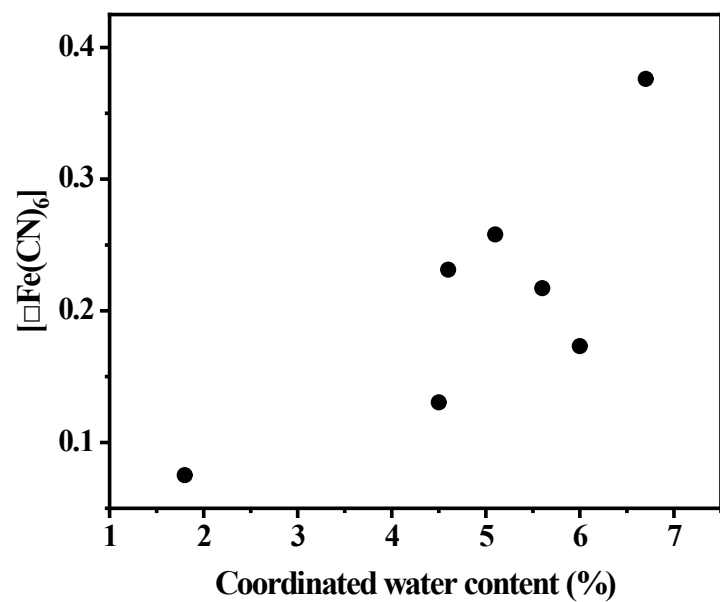

Figure S5. Relationship between coordinated water content and  $[\square\text{Fe}(\text{CN})_6]$ .

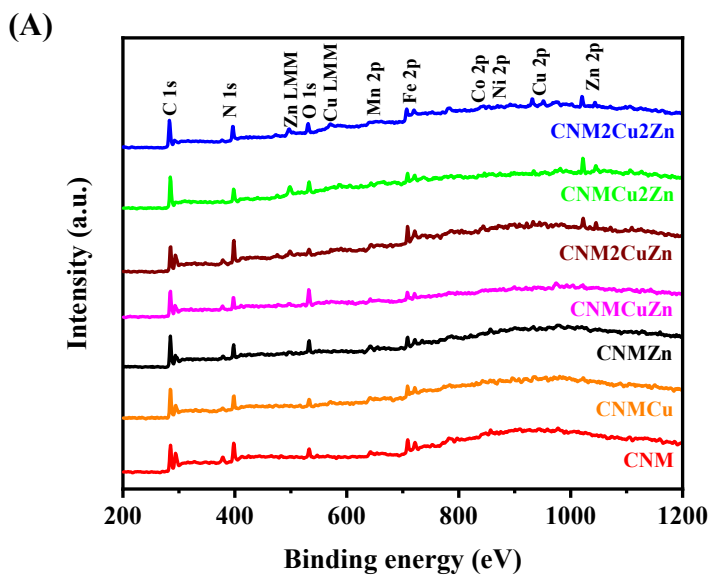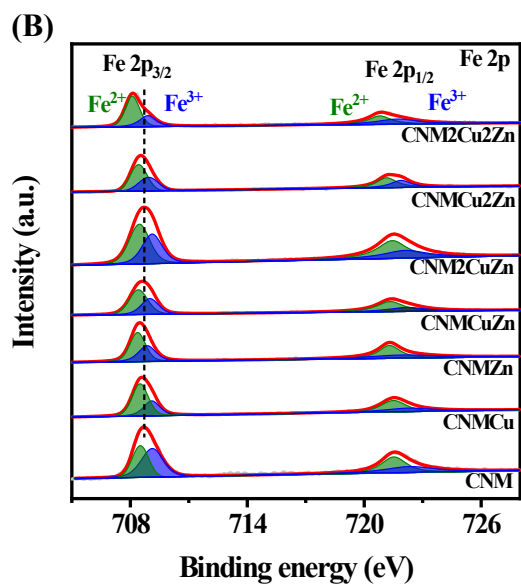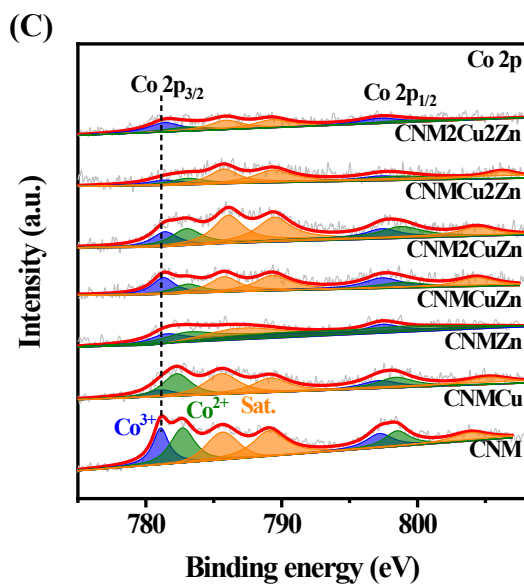

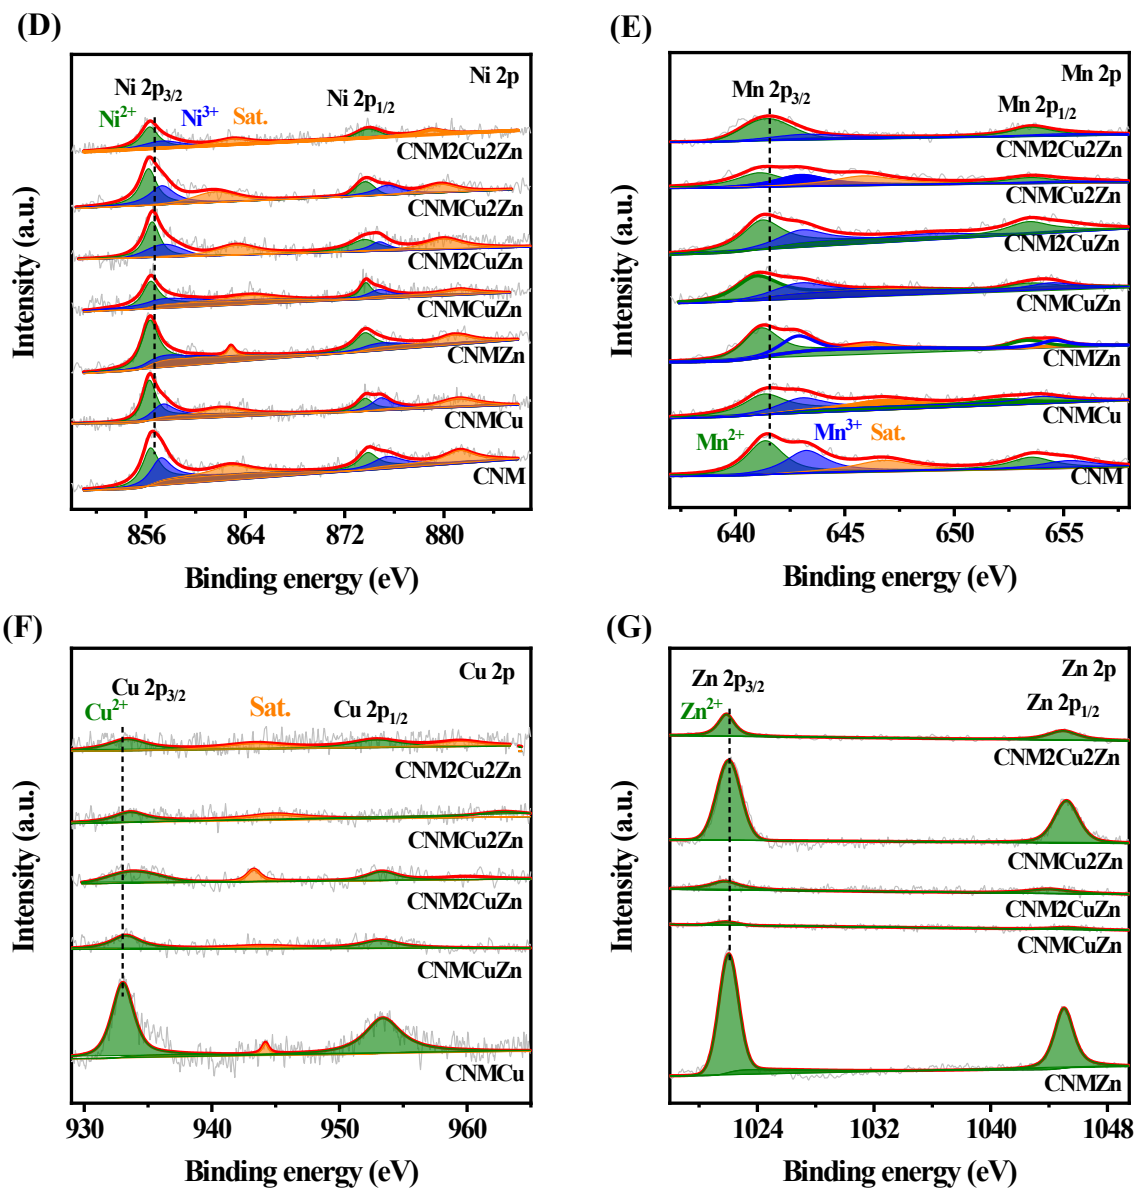

Figure S6. (A) XPS survey spectra of PBAs. High-resolution XPS spectra of PBAs. (B) Fe 2p, (C) Co 2p, (D) Ni 2p, (E) Mn 2p, (F) Cu 2p, and (G) Zn 2p.

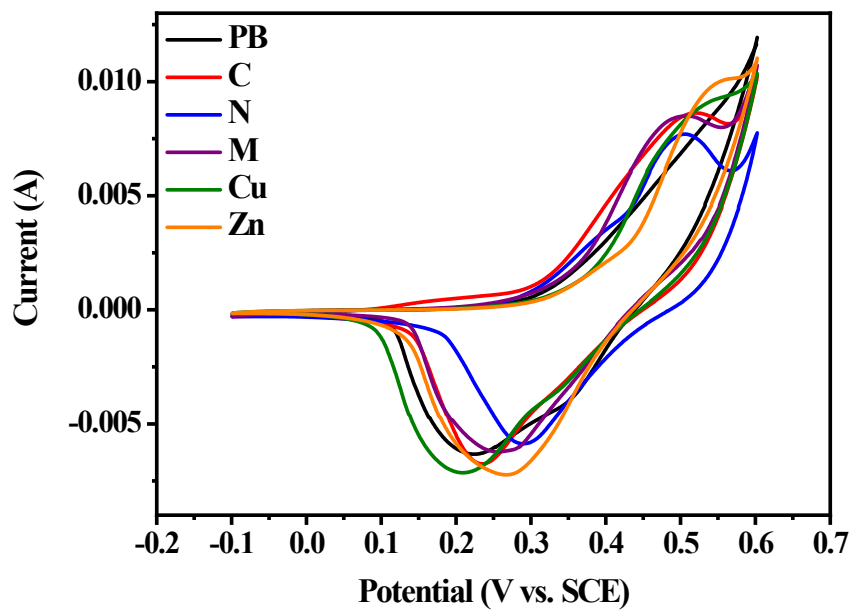

Figure S7. CV curve of the as-synthesized PB and unary-PBAs at a scan rate of 5 mV s<sup>-1</sup>.

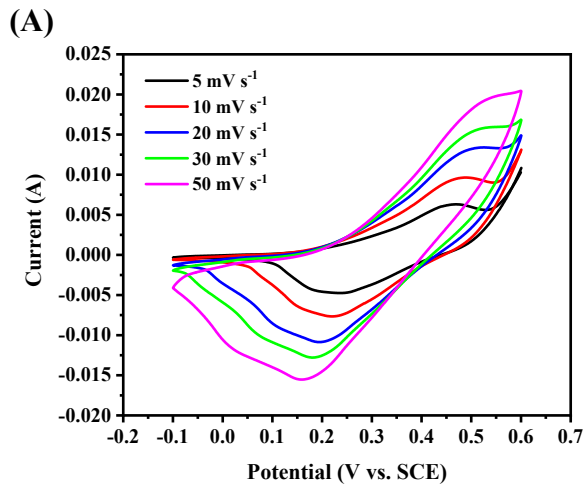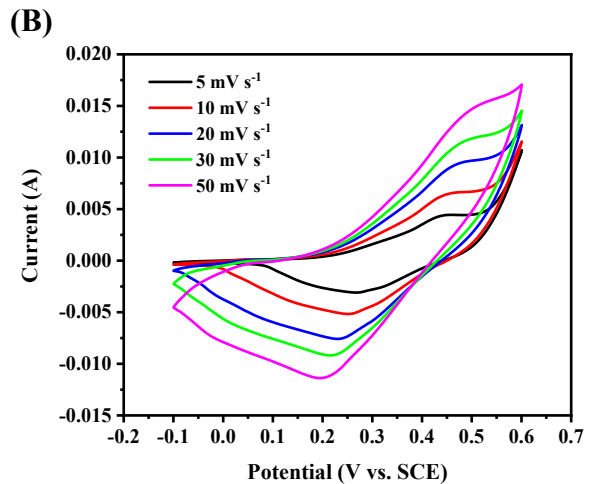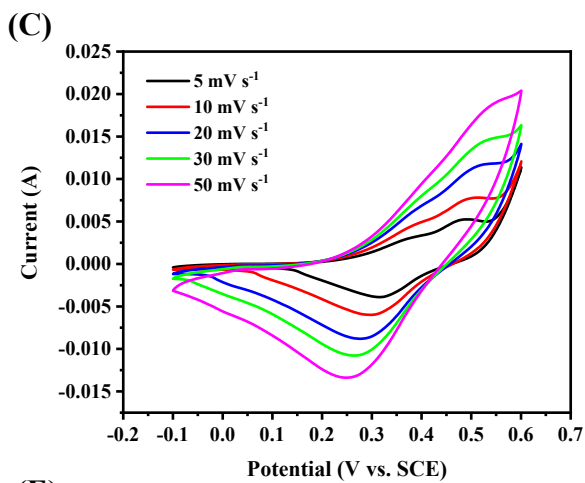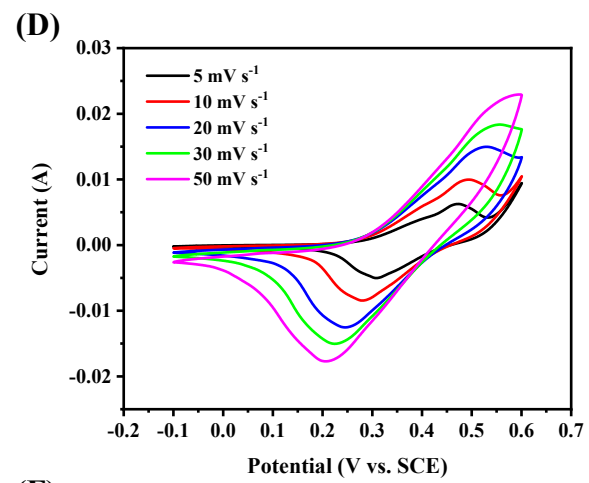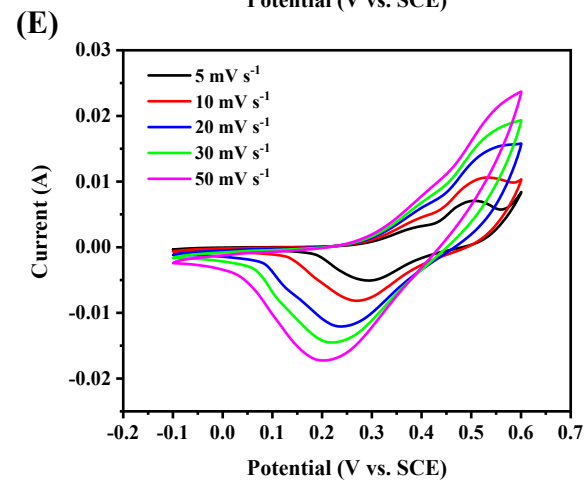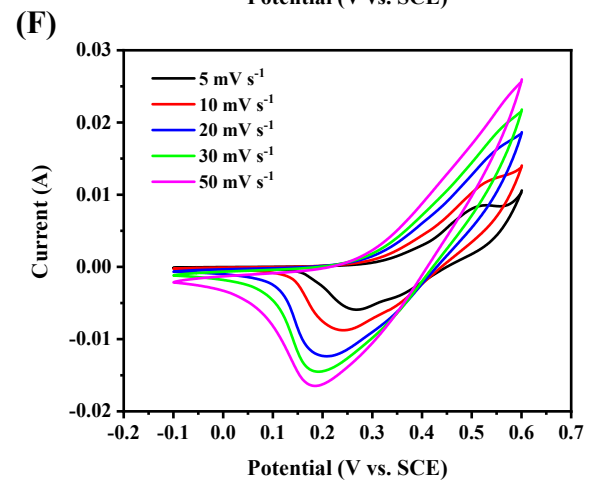

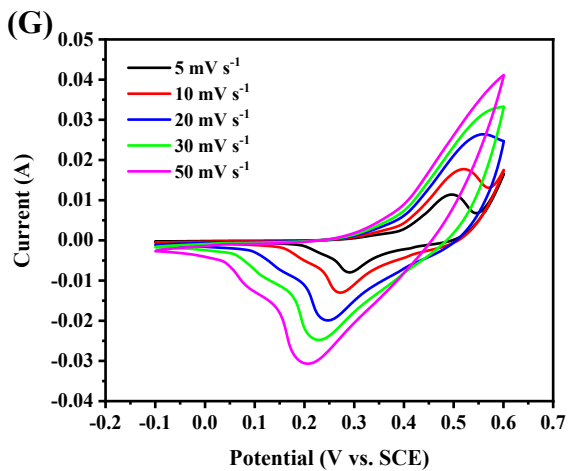

Figure S8. CV curves of various PBAs obtained at different scan rates from 5 to 50  $\text{mV s}^{-1}$ . (A) CNM, (B) CNMCu, (C) CNMZn, (D) CNMCuZn, (E) CNM2CuZn, (F) CNMCu2Zn, and (G) CNM2Cu2Zn.



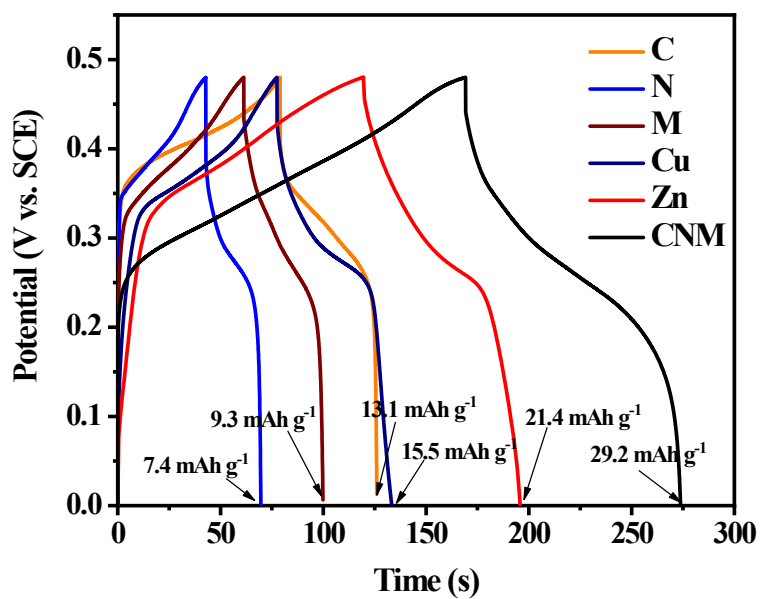

Figure S9. GCD curves of single-metal PBAs at a current density of 1 A g<sup>-1</sup>.

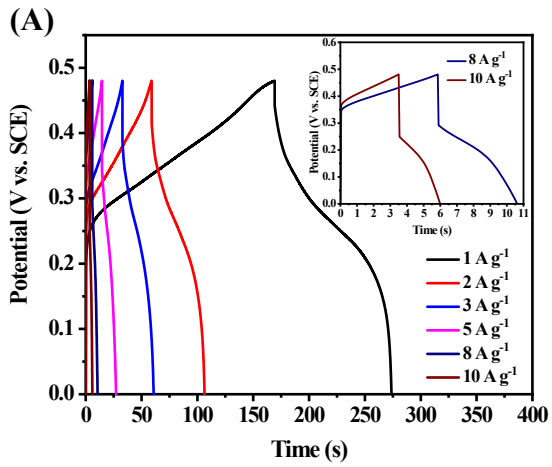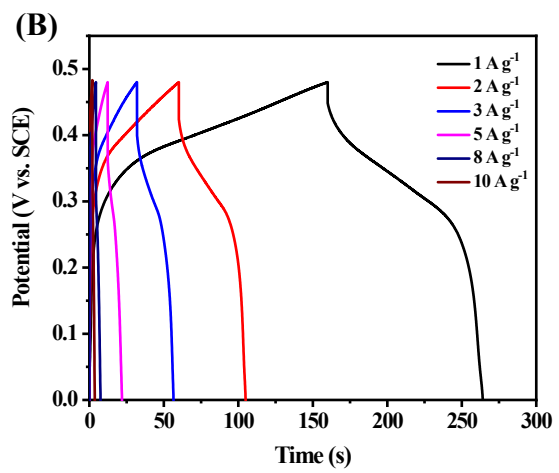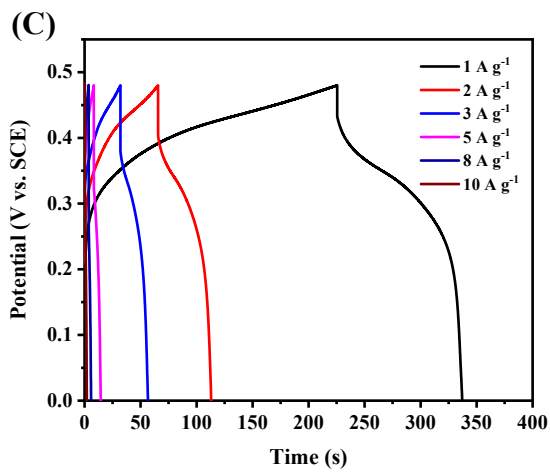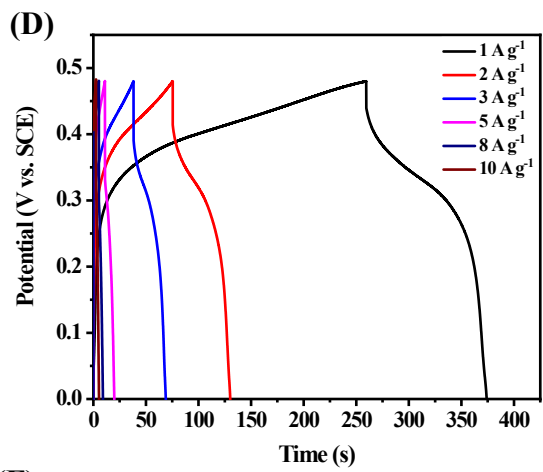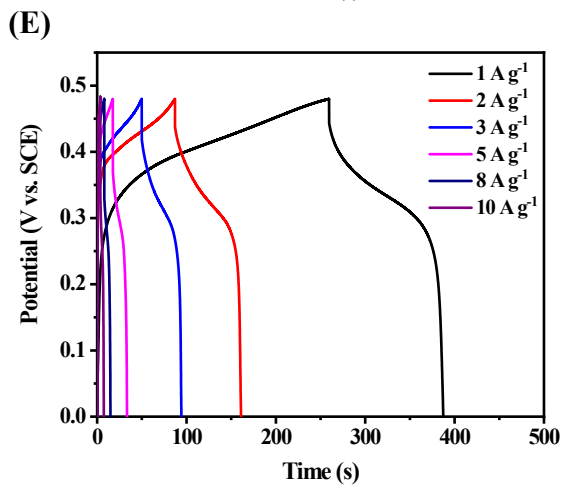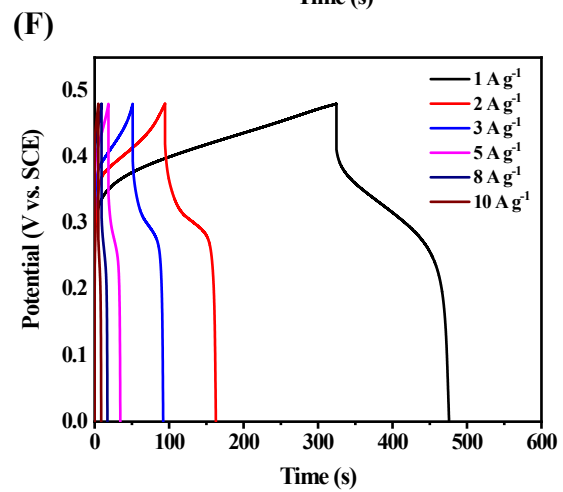

(G)

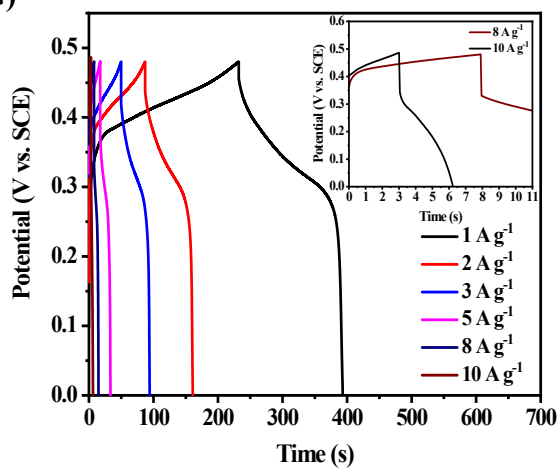

Figure S10. GCD curves of (A) CNM, (B) CNMCu, (C) CNMZn, (D) CNMCuZn, (E) CNM2CuZn, (F) CNMCu2Zn, and (G) CNM2Cu2Zn.

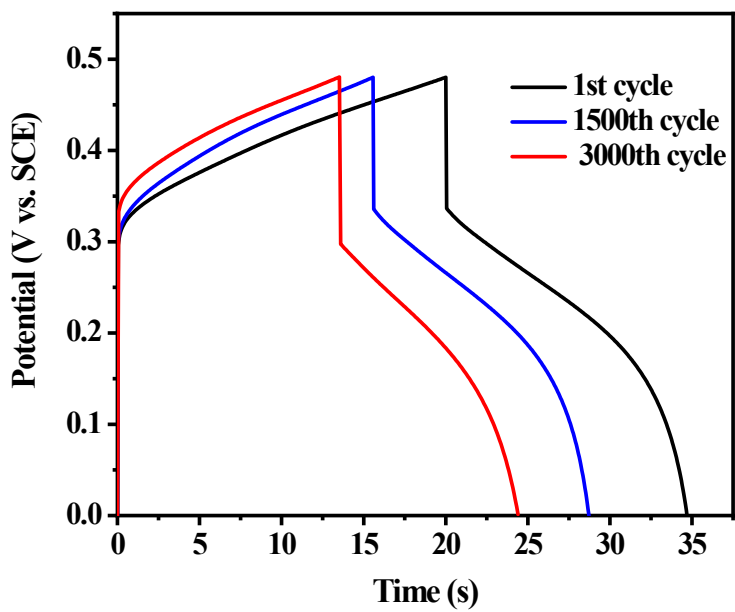

Figure S11. GCD curves of sample CNM2Cu2Zn at different stages during the cycle test.

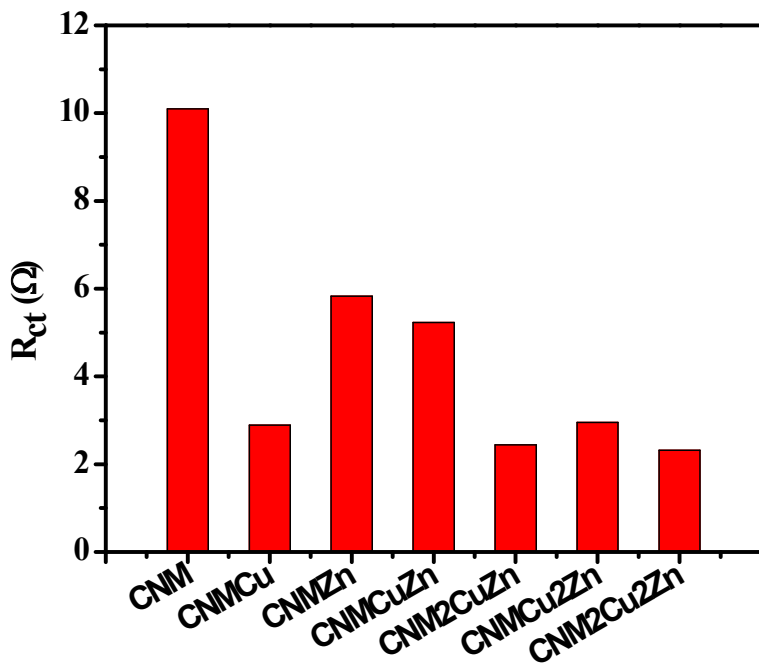

Figure S12. Charge transfer resistance of various PBAs.

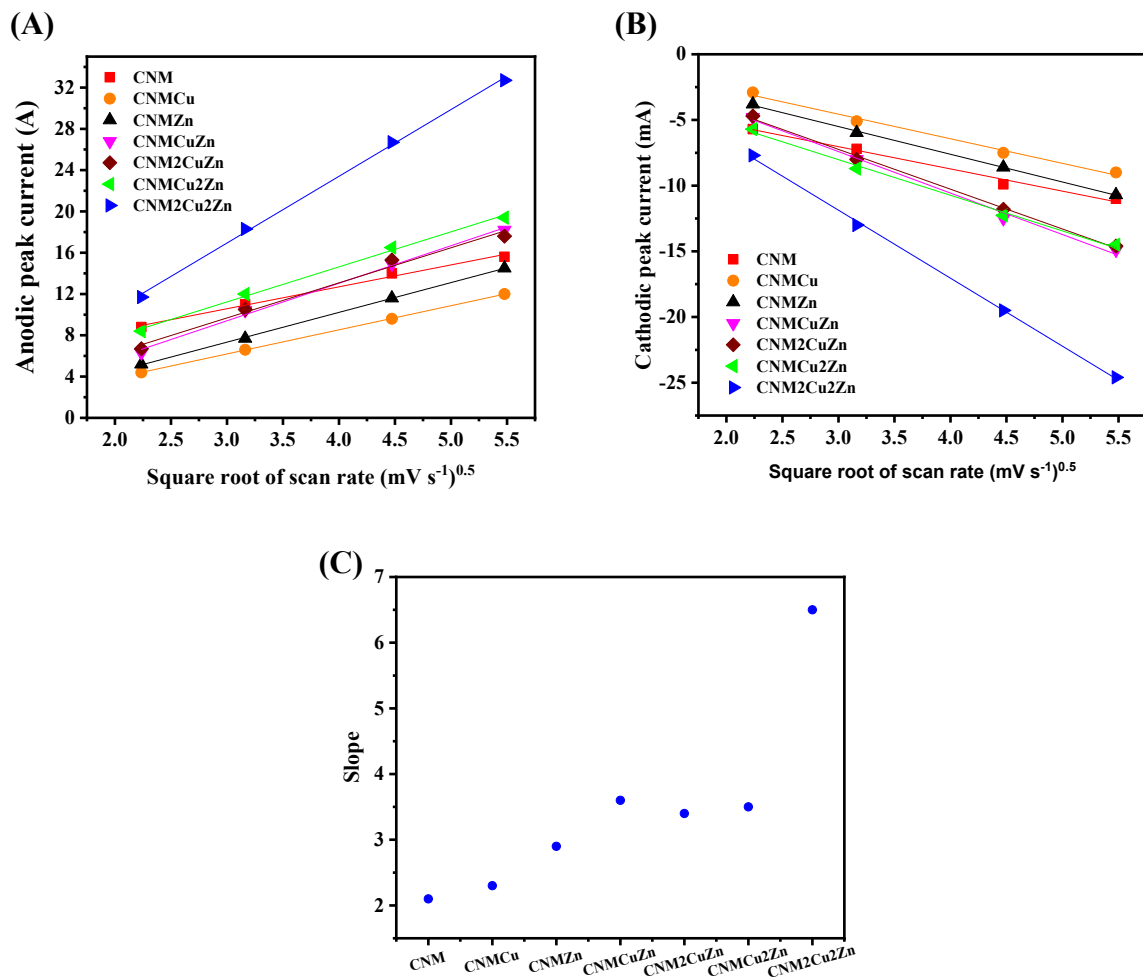

Figure S13. The peak current vs. square root of scan rate: (A) anodic and (B) cathodic. (C) Slopes, representing the ion diffusion coefficient, of various samples obtained from Figure (A).

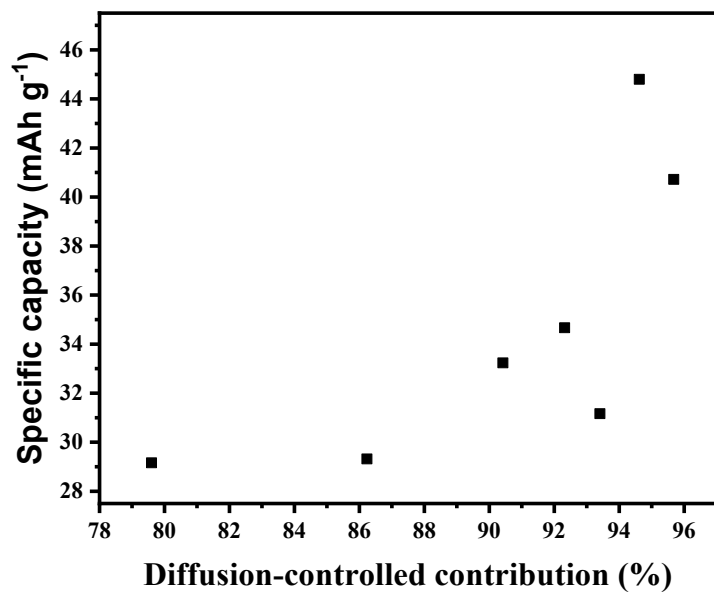

Figure S14. Specific capacity increases with the diffusion-controlled charge storage (calculated from CV curves at 5 mV s<sup>-1</sup>).

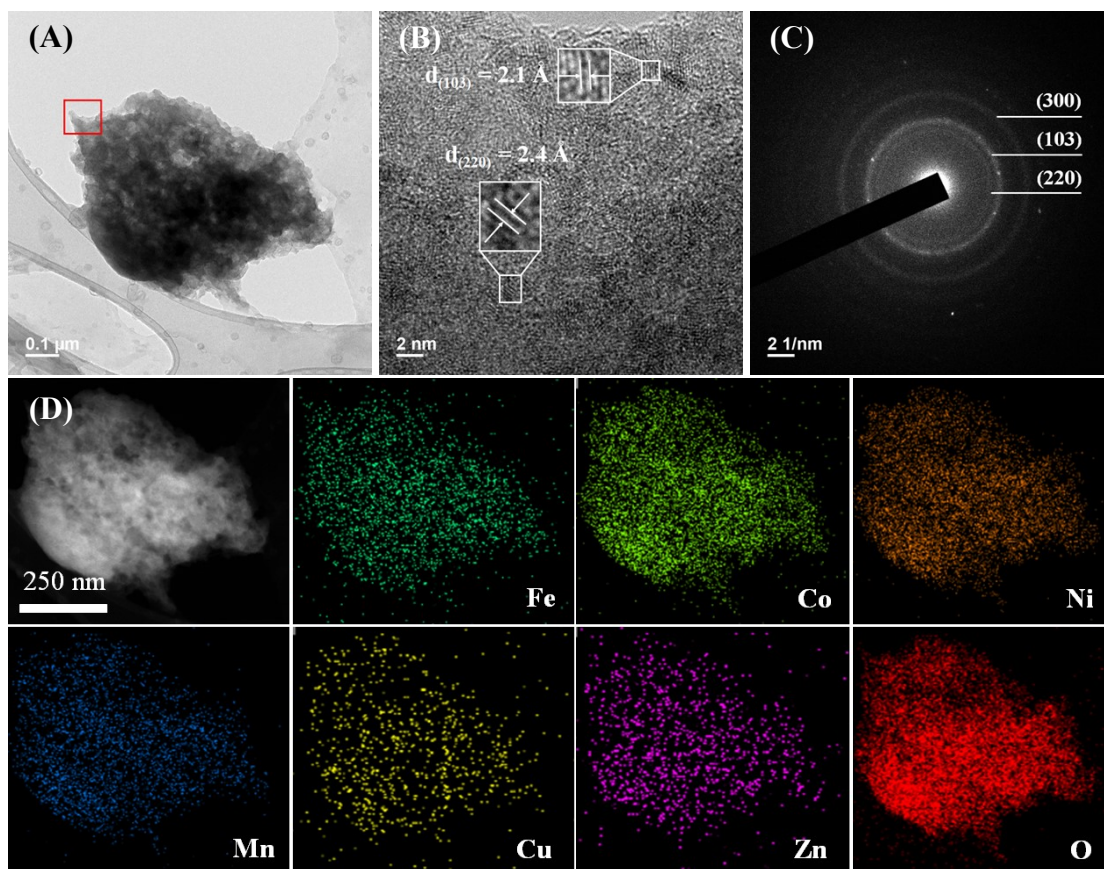

Figure S15. TEM of CNM2Cu2Zn after 10 cycles of charge-discharge. (A) TEM image, (B) HR-TEM image of red rectangle in (A), (C) SAED pattern of (B), and (D) HAADF image and EDS mapping.



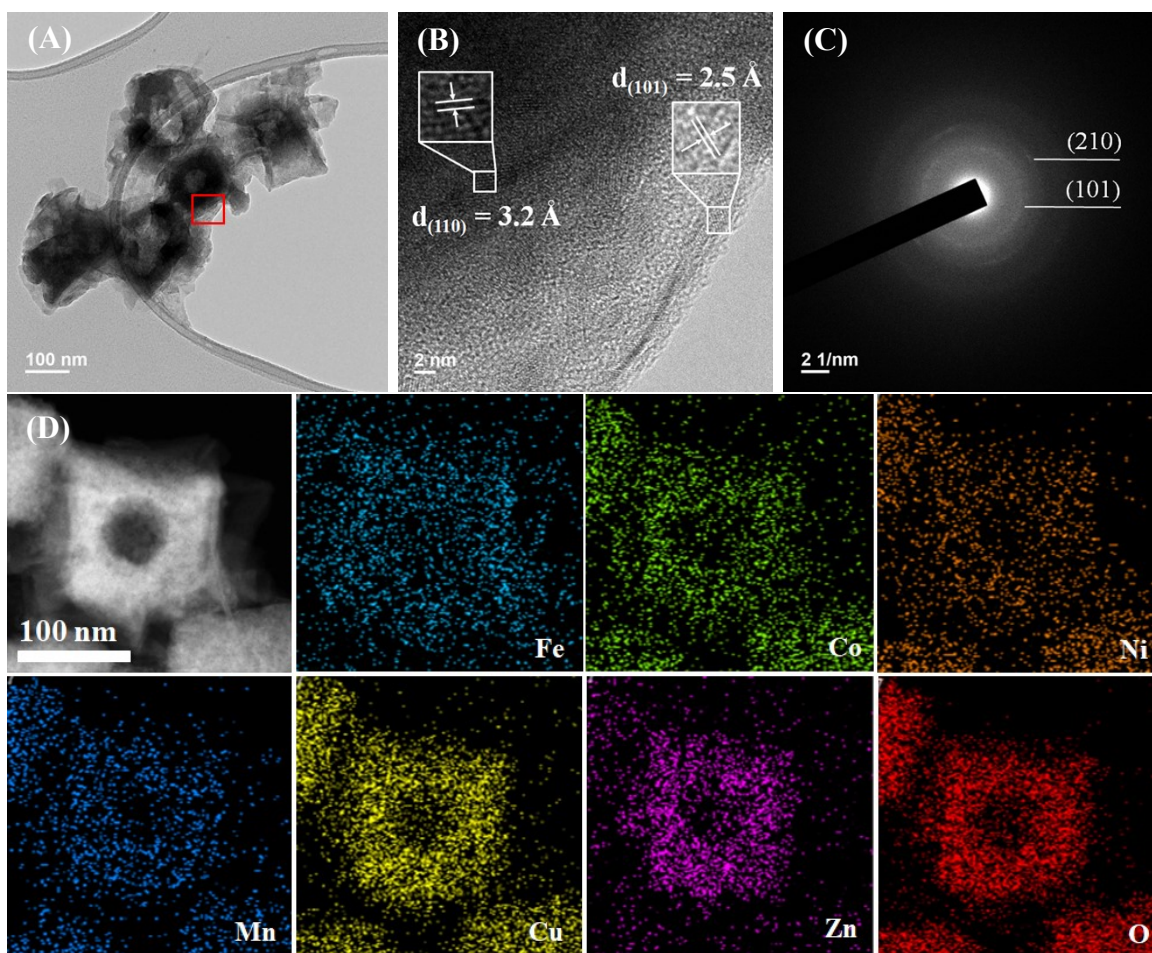

Figure S16. Post-TEM of CNM2CuZn after OER. (A) TEM image, (B) HR-TEM image of red rectangle in (A), (C) SAED pattern of (B), and (D) HAADF image and EDS mapping.

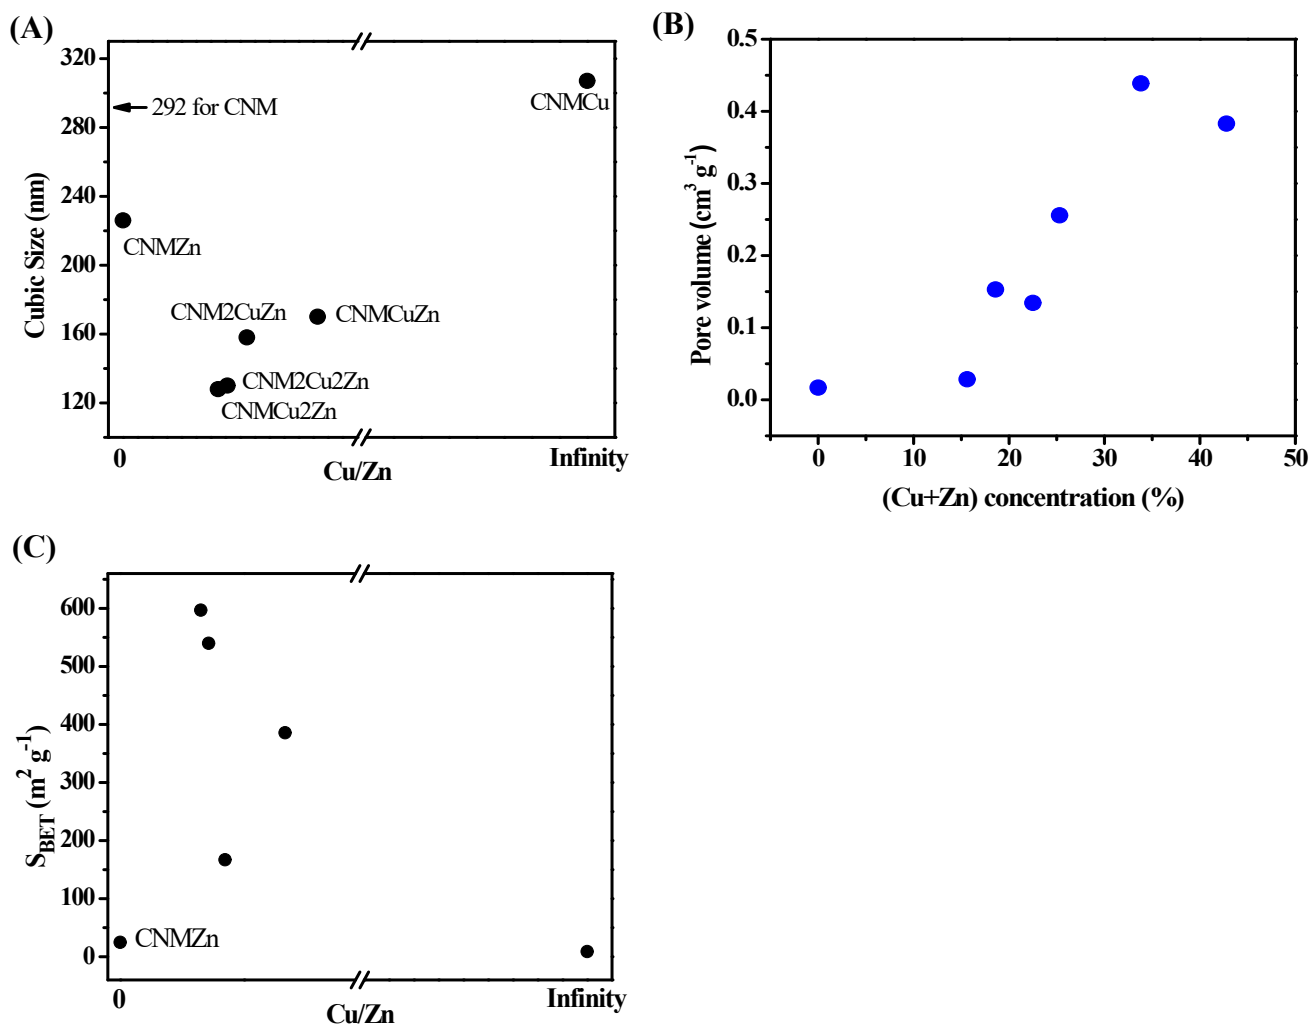

Figure S17. (A) Cubic size as a function of Cu/Zn ratio. (B) Pore volume increases with the (Cu+Zn) content. (C) BET surface area vs. Cu/Zn ratio.

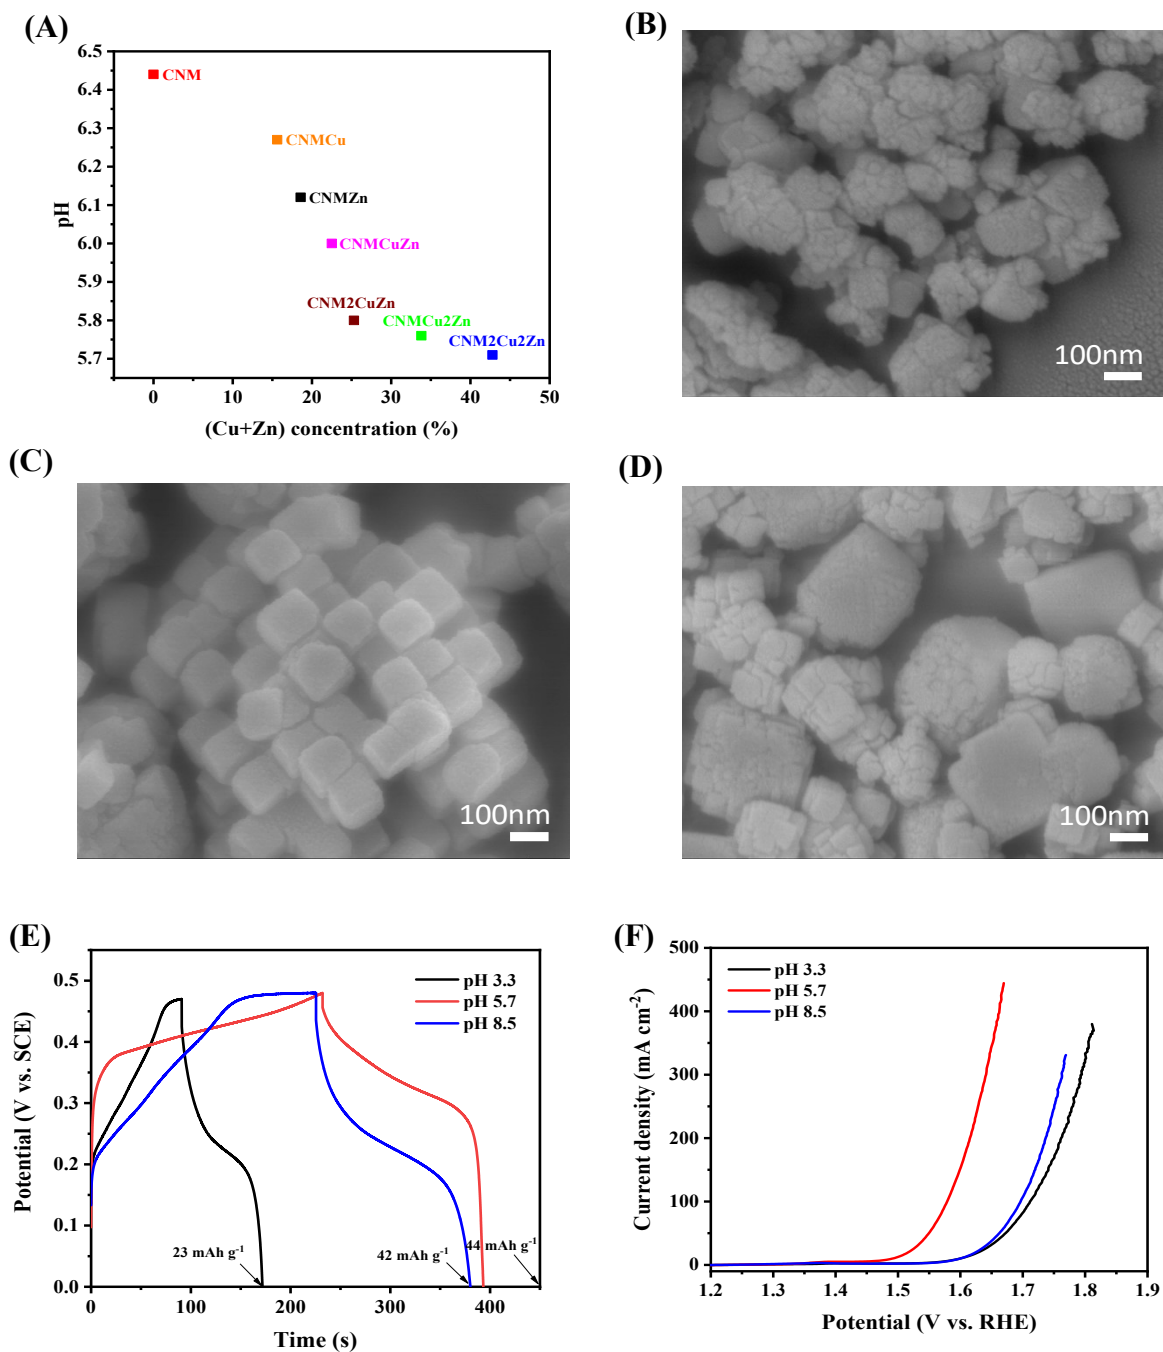

Figure S18. (A) pH value as function of the (Cu+Zn) concentration. SEM images of the CNM2Cu2Zn obtained at different precursor solution pH values: (B) 3.3, (C) 5.7, and (D) 8.5. (E) Capacity and (F) overpotential of CNM2Cu2Zn at different pH values.

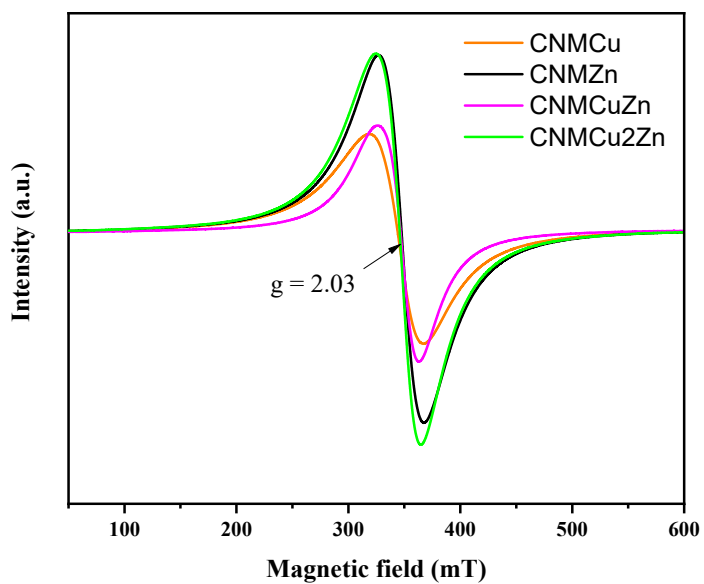

Figure S19. EPR analysis of various PBAs.

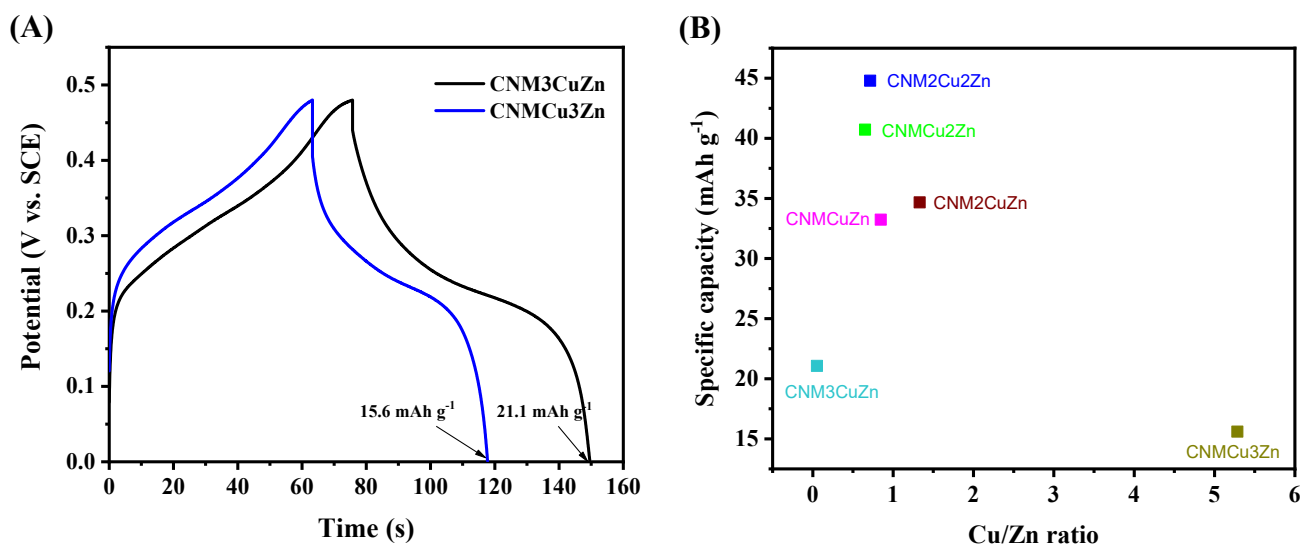

Figure S20. (A) GCD curves of CNM3CuZn and CNMCu3Zn at 1 A g<sup>-1</sup>. (B) Cu/Zn ratio controls the specific capacity of HEPBAs.

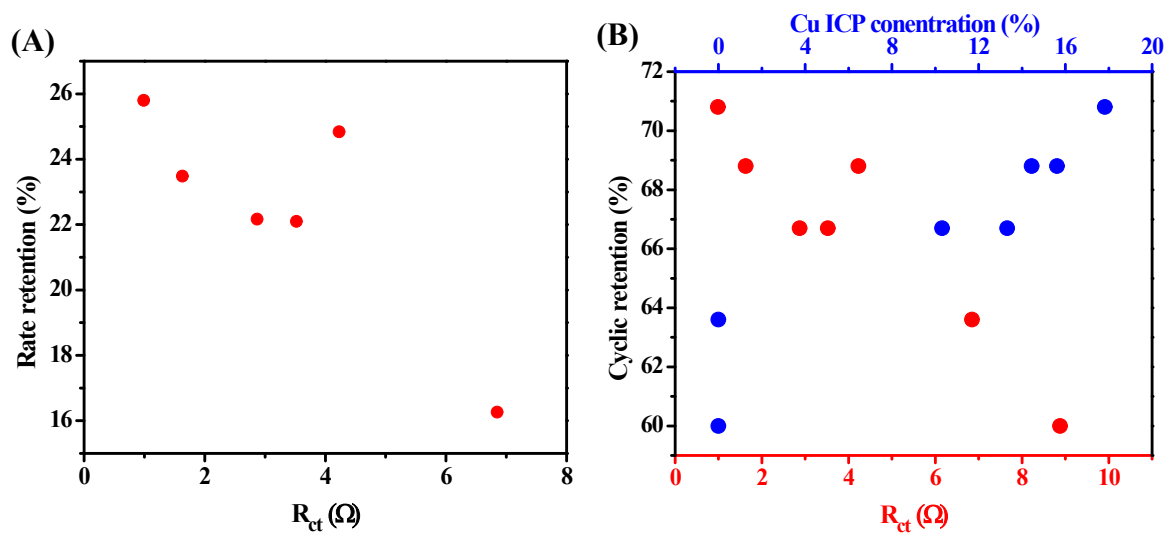

Figure S21. The effects of conductivity on the (A) rate retention and (B) cycle stability.

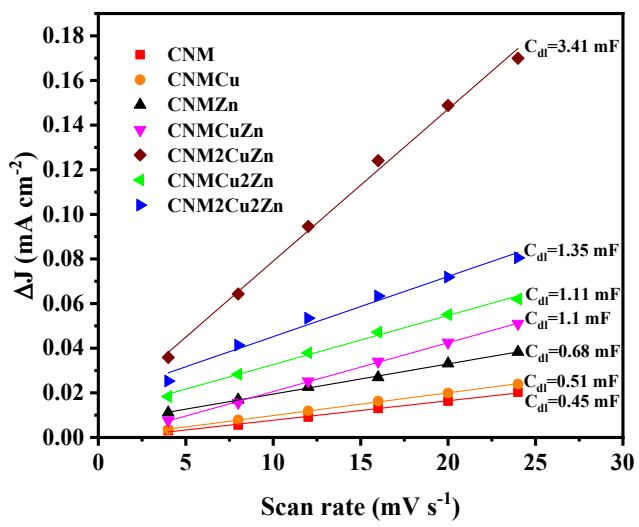

Figure S22. Cdl plots of PBAs.

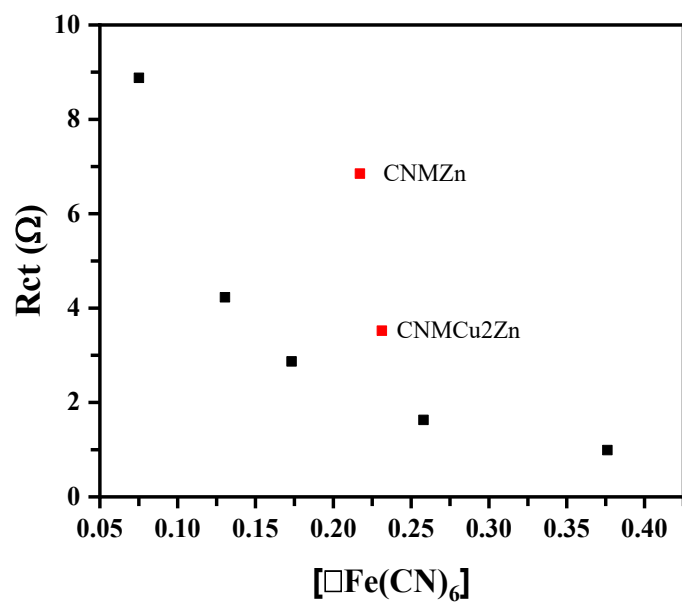

Figure S23. The correlation between the  $[\text{Fe}(\text{CN})_6]$  and  $\text{Ret}$ .



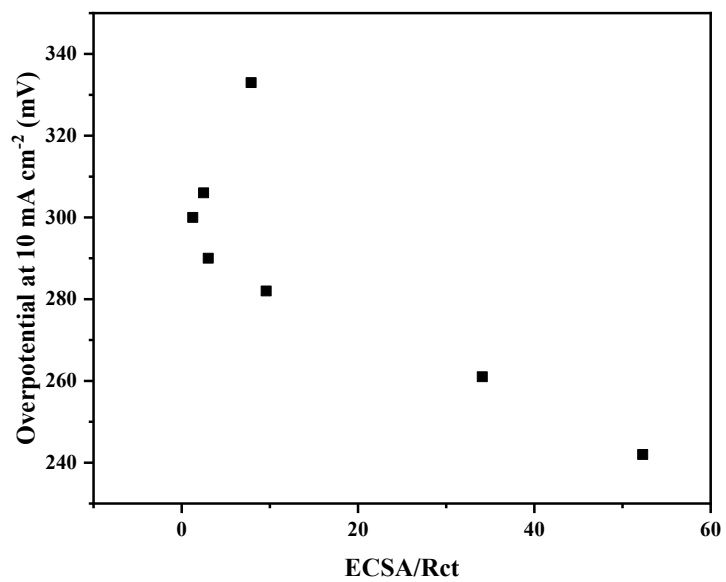

Figure S24. Overpotential decreases with ECSA/Rct.

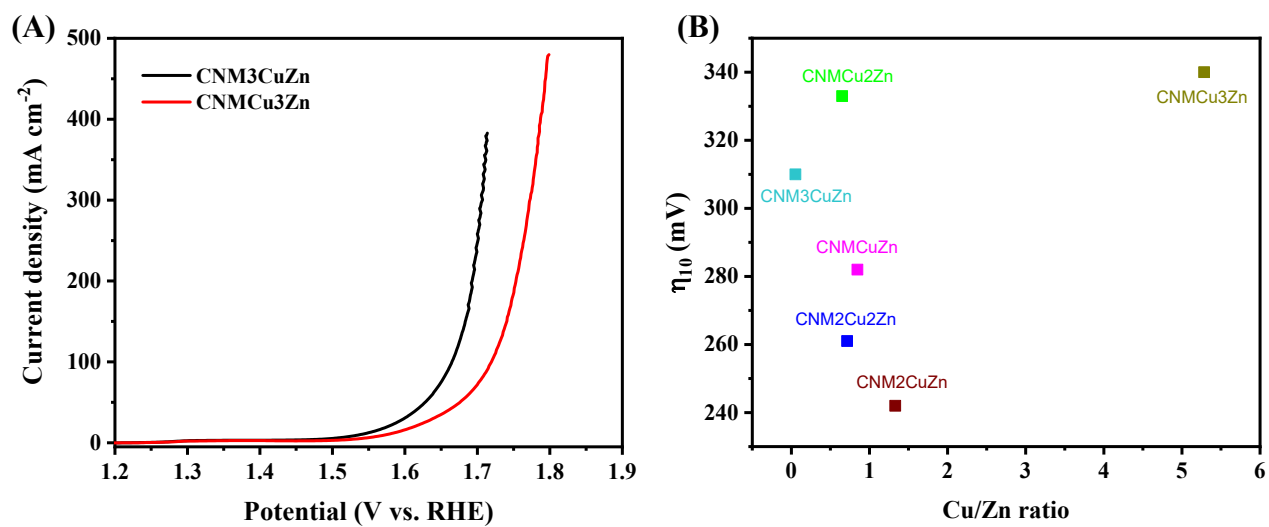

Figure S25. (A) LSV curves of CNM3CuZn and CNMCu3Zn at  $1 \text{ A g}^{-1}$ . (B) Cu/Zn ratio controls the overpotential of HEPBAs.

## Reference

1. J.-W. Yeh, S.-K. Chen, S.-J. Lin, J.-Y. Gan, T.-S. Chin, T.-T. Shun, C.-H. Tsau and S.-Y. Chang, *Adv. Eng. Mater.*, 2004, **6**, 299-303.
2. Y. Ma, Y. Ma, Q. Wang, S. Schweidler, M. Botros, T. Fu, H. Hahn, T. Brezesinski and B. Breitung, *Energy Environ. Sci.*, 2021, **14**, 2883-2905.
3. F. Zhao, Y. Wang, X. Xu, Y. Liu, R. Song, G. Lu and Y. Li, *ACS Appl. Mater. Interfaces*, 2014, **6**, 11007-11012.
4. Y. Yue, Z. Zhang, A. J. Binder, J. Chen, X. Jin, S. H. Overbury and S. Dai, *ChemSusChem*, 2015, **8**, 177-183.
5. Y. Qiu, Y. Lin, H. Yang and L. Wang, *J. Alloys Comp.*, 2019, **806**, 1315-1322.
6. P. Zhu, X. Li, H. Yao and H. Pang, *J. Energy Storage*, 2020, **31**, 101544.
7. W. Jiang, T. Wang, H. Chen, X. Suo, J. Liang, W. Zhu, H. Li and S. Dai, *Nano Energy*, 2021, **79**, 105464.
8. X. Su, Y. Wang, J. Zhou, S. Gu, J. Li and S. Zhang, *J. Am. Chem. Soc.*, 2018, **140**, 11286-11292.
9. W. Zhang, H. Song, Y. Cheng, C. Liu, C. Wang, M. A. N. Khan, H. Zhang, J. Liu, C. Yu, L. Wang and J. Li, *Adv. Sci.*, 2019, **6**, 1801901.
10. H. Xu, H. Y. Shang, L. J. Jin, C. Y. Chen, C. Wang and Y. K. Du, *J Mater Chem A*, 2019, **7**, 26905-26910.
11. J. T. Hou, Z. M. Tang, K. Y. Wei, Q. X. Lai and Y. Y. Liang, *Catal Sci Technol*, 2021, **11**, 1110-1115.

12. M. M. Jiang, X. M. Fan, S. Cao, Z. H. Wang, Z. H. Yang and W. X. Zhang, *J Mater Chem A*, 2021, **9**, 12734-12745.
13. J. L. Wang, M. L. Zhang, J. H. Li, F. X. Jiao, Y. Lin and Y. Q. Gong, *Dalton T*, 2020, **49**, 14290-14296.
